# Supplementary material for: The Impact of Intolerance of Uncertainty on Negative Emotions in COVID-19: Mediation by Pandemic-Focused Time and Moderation by Perceived Efficacy
Source: MDPI journal article supplement (doi:10.3390/ijerph18084189), 2021-04-15
Supplement: s1 [file s1]

Table S1 Correlations among three negative emotions.

| Variables    | $M \pm SD$      | 1        | 2        | 3 |
|--------------|-----------------|----------|----------|---|
| 1 Fear       | $2.71 \pm 1.68$ | 1        |          |   |
| 2 Anxiety    | $3.38 \pm 1.78$ | 0.668*** | 1        |   |
| 3 Depression | $2.66 \pm 1.67$ | 0.697*** | 0.699*** | 1 |

Note: N = 1022. \*\*\*,  $p < 0.001$ .
